# Supplementary material
Source: PubMed Central journal article supplement (PMC3787978)
Supplement: NIHMS493913-supplement-01.pdf [file NIHMS493913-supplement-01.pdf]

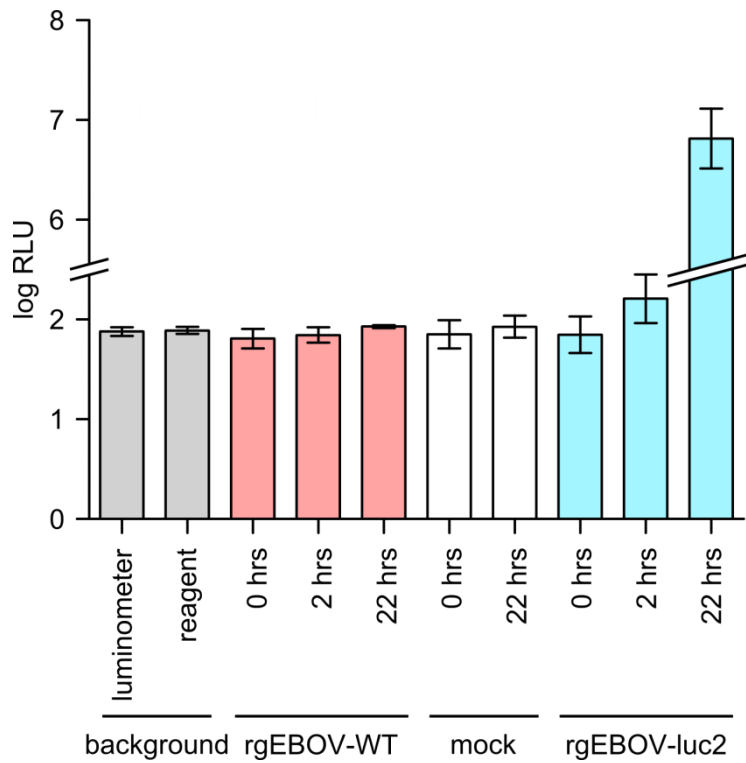

Suppl. Fig. 1: **Background signal of luminescence measurement.** Vero cells were infected for 1 hour on ice with the indicated viruses at an MOI of 0.5. The inoculum was removed, and cells were shifted to 37°C. Reporter activity in cell lysates (approximately 200,000 cells) was measured at the indicated time points after infection. As a control, background noise of the luminometer (background luminometer) as well as background signal caused by lysis buffer and luciferase reagent in absence of cell lysate (background reagent) was measured.
